## Retraction

## Retraction: Hsa-miR-134 suppresses non-small cell lung cancer (NSCLC) development through down-regulation of CCND1

Cheng-Cao Sun<sup>1</sup>, Shu-Jun Li<sup>1,2</sup> and De-Jia Li<sup>1</sup>

<sup>1</sup>Department of Occupational and Environmental Health, School of Public Health, Wuhan University, Wuhan, P. R. China

<sup>2</sup>Wuhan Hospital for The Prevention and Treatment of Occupational Diseases, Wuhan, P. R. China

**Published:**

**Copyright:** © 2024 Sun et al. This is an open access article distributed under the terms of the [Creative Commons Attribution License](#) (CC BY 4.0), which permits unrestricted use, distribution, and reproduction in any medium, provided the original author and source are credited.

**This article has been retracted:** This article contains duplicated images found in a previously published paper. Specifically, all eight panels of Figure 6A are duplicates of those in Figure 6A of a paper published simultaneously, both which are organized in a nearly identical way [1]. Additionally, figures 4F, 4H, 5D and 7C are duplicates of 4F, 4H, 5D and 7C from [1]. Two of the panels in 6A are also found in Figure 5B of an earlier paper [2]. The data and comments provided to Oncotarget did not resolve the concerns about the integrity and reliability of the reported data. Therefore, with the agreement of all authors, the Scientific Integrity office at Oncotarget has decided to retract this paper.

Original article: Oncotarget. 2016; 7:35960–35978. <https://doi.org/10.18632/oncotarget.8482>

### REFERENCES

1. Zhang T, Cai X, Li Q, Xue P, Chen Z, Dong X, Xue Y. Hsa-miR-875-5p exerts tumor suppressor function through down-regulation of EGFR in colorectal carcinoma (CRC). Oncotarget. 2016; 7:42225–40. <https://doi.org/10.18632/oncotarget.9944>. [PubMed]
2. Sun CC, Li SJ, Zhang F, Pan JY, Wang L, Yang CL, Xi YY, Li de J. Hsa-miR-329 exerts tumor suppressor function through down-regulation of MET in non-small cell lung cancer. Oncotarget. 2016; 7:21510–26. <https://doi.org/10.18632/oncotarget.7517>. [PubMed]
